# Supplementary material for: Microproteomic-Based Analysis of the Goat Milk Protein Synthesis Network and Casein Production Evaluation
Source: MDPI journal article supplement (doi:10.3390/foods13040619), 2024-02-19
Supplement: s1 [file s1]

## Supporting Information

### **Microproteomic-Based Analysis of the Goat Milk Protein Synthesis Network and Casein Production Evaluation**

**Li Chen** <sup>1,2,\*</sup>, **Hiroaki Taniguchi** <sup>3,4</sup> and **Emilia Bagnicka** <sup>1,\*</sup>

<sup>1</sup> Department of Biotechnology and Nutrigenomics, Institute of Genetics and Animal Biotechnology, Polish Academy of Sciences, 05-552 Jastrzębiec, Poland

<sup>2</sup> College of Food Engineering and Nutritional Science, Shaanxi Normal University, Xi'an, 710119, China

<sup>3</sup> Department of Experimental Embryology, Institute of Genetics and Animal Biotechnology, Polish Academy of Sciences, 05-552 Jastrzębiec, Poland; h.taniguchi@igbzpan.pl

<sup>4</sup> African Genome Center, University Mohammed VI Polytechnic (UM6P), Lot 660, Hay Moulay Rachid, Ben Guerir 43150, Morocco

\* Correspondence: l.chen@igbzpan.pl (L.C.); e.bagnicka@igbzpan.pl (E.B.);  
Tel.: +48-(22)-7367000 (E.B.)

**Table S1. Pathway annotation analysis of identified proteins in GMECs**

|    | Pathway                                     | Proteins with pathway annotation<br>(3055) | Pathway ID | Level1                               | Level2                           |
|----|---------------------------------------------|--------------------------------------------|------------|--------------------------------------|----------------------------------|
| 1  | Metabolic pathways                          | 472 (15.45%)                               | ko01100    | Metabolism                           | Global and overview maps         |
| 2  | Pathways in cancer                          | 121 (3.96%)                                | ko05200    | Human Diseases                       | Cancers: Overview                |
| 3  | Endocytosis                                 | 117 (3.83%)                                | ko04144    | Cellular Processes                   | Transport and catabolism         |
| 4  | Ribosome                                    | 111 (3.63%)                                | ko03010    | Genetic Information Processing       | Translation                      |
| 5  | Spliceosome                                 | 108 (3.54%)                                | ko03040    | Genetic Information Processing       | Transcription                    |
| 6  | Thermogenesis                               | 108 (3.54%)                                | ko04714    | Organismal Systems                   | Environmental adaptation         |
| 7  | Human papillomavirus infection              | 106 (3.47%)                                | ko05165    | Human Diseases                       | Infectious diseases: Viral       |
| 8  | Huntington disease                          | 103 (3.37%)                                | ko05016    | Human Diseases                       | Neurodegenerative diseases       |
| 9  | RNA transport                               | 102 (3.34%)                                | ko03013    | Genetic Information Processing       | Translation                      |
| 10 | Alzheimer disease                           | 100 (3.27%)                                | ko05010    | Human Diseases                       | Neurodegenerative diseases       |
| 11 | Regulation of actin cytoskeleton            | 95 (3.11%)                                 | ko04810    | Cellular Processes                   | Cell motility                    |
| 12 | Protein processing in endoplasmic reticulum | 95 (3.11%)                                 | ko04141    | Genetic Information Processing       | Folding, sorting and degradation |
| 13 | Oxidative phosphorylation                   | 89 (2.91%)                                 | ko00190    | Metabolism                           | Energy metabolism                |
| 14 | Parkinson disease                           | 89 (2.91%)                                 | ko05012    | Human Diseases                       | Neurodegenerative diseases       |
| 15 | Focal adhesion                              | 89 (2.91%)                                 | ko04510    | Cellular Processes                   | Cellular community - eukaryotes  |
| 16 | PI3K-Akt signaling pathway                  | 86 (2.82%)                                 | ko04151    | Environmental Information Processing | Signal transduction              |
| 17 | Tight junction                              | 81 (2.65%)                                 | ko04530    | Cellular Processes                   | Cellular community - eukaryotes  |
| 18 | Carbon metabolism                           | 81 (2.65%)                                 | ko01200    | Metabolism                           | Global and overview maps         |
| 19 | Human immunodeficiency virus 1 infection    | 78 (2.55%)                                 | ko05170    | Human Diseases                       | Infectious diseases: Viral       |
| 20 | Proteoglycans in cancer                     | 75 (2.45%)                                 | ko05205    | Human Diseases                       | Cancers: Overview                |
| 21 | Viral carcinogenesis                        | 75 (2.45%)                                 | ko05203    | Human Diseases                       | Cancers: Overview                |
| 22 | Phagosome                                   | 74 (2.42%)                                 | ko04145    | Cellular Processes                   | Transport and catabolism         |
| 23 | Non-alcoholic fatty liver disease (NAFLD)   | 72 (2.36%)                                 | ko04932    | Human Diseases                       | Endocrine and metabolic diseases |
| 24 | Epstein-Barr virus infection                | 68 (2.23%)                                 | ko05169    | Human Diseases                       | Infectious diseases: Viral       |
| 25 | Human cytomegalovirus infection             | 66 (2.16%)                                 | ko05163    | Human Diseases                       | Infectious diseases: Viral       |
| 26 | MAPK signaling pathway                      | 66 (2.16%)                                 | ko04010    | Environmental Information Processing | Signal transduction              |
| 27 | Influenza A                                 | 62 (2.03%)                                 | ko05164    | Human Diseases                       | Infectious diseases: Viral       |
| 28 | Cellular senescence                         | 56 (1.83%)                                 | ko04218    | Cellular Processes                   | Cell growth and death            |
| 29 | Necroptosis                                 | 56 (1.83%)                                 | ko04217    | Cellular Processes                   | Cell growth and death            |
| 30 | Herpes simplex infection                    | 55 (1.8%)                                  | ko05168    | Human Diseases                       | Infectious diseases: Viral       |
| 31 | Apoptosis                                   | 54 (1.77%)                                 | ko04210    | Cellular Processes                   | Cell growth and death            |

|    |                                                 |            |         |                                      |                                  |
|----|-------------------------------------------------|------------|---------|--------------------------------------|----------------------------------|
| 32 | Lysosome                                        | 53 (1.73%) | ko04142 | Cellular Processes                   | Transport and catabolism         |
| 33 | Human T-cell leukemia virus 1 infection         | 53 (1.73%) | ko05166 | Human Diseases                       | Infectious diseases: Viral       |
| 34 | Ras signaling pathway                           | 52 (1.7%)  | ko04014 | Environmental Information Processing | Signal transduction              |
| 35 | mRNA surveillance pathway                       | 52 (1.7%)  | ko03015 | Genetic Information Processing       | Translation                      |
| 36 | Hepatitis C                                     | 52 (1.7%)  | ko05160 | Human Diseases                       | Infectious diseases: Viral       |
| 37 | Retrograde endocannabinoid signaling            | 51 (1.67%) | ko04723 | Organismal Systems                   | Nervous system                   |
| 38 | Bacterial invasion of epithelial cells          | 51 (1.67%) | ko05100 | Human Diseases                       | Infectious diseases: Bacterial   |
| 39 | Kaposi sarcoma-associated herpesvirus infection | 49 (1.6%)  | ko05167 | Human Diseases                       | Infectious diseases: Viral       |
| 40 | Rap1 signaling pathway                          | 49 (1.6%)  | ko04015 | Environmental Information Processing | Signal transduction              |
| 41 | MicroRNAs in cancer                             | 49 (1.6%)  | ko05206 | Human Diseases                       | Cancers: Overview                |
| 42 | Biosynthesis of amino acids                     | 49 (1.6%)  | ko01230 | Metabolism                           | Global and overview maps         |
| 43 | Platelet activation                             | 49 (1.6%)  | ko04611 | Organismal Systems                   | Immune system                    |
| 44 | Estrogen signaling pathway                      | 48 (1.57%) | ko04915 | Organismal Systems                   | Endocrine system                 |
| 45 | Adrenergic signaling in cardiomyocytes          | 47 (1.54%) | ko04261 | Organismal Systems                   | Circulatory system               |
| 46 | Hippo signaling pathway                         | 46 (1.51%) | ko04390 | Environmental Information Processing | Signal transduction              |
| 47 | Ubiquitin mediated proteolysis                  | 46 (1.51%) | ko04120 | Genetic Information Processing       | Folding, sorting and degradation |
| 48 | cGMP-PKG signaling pathway                      | 46 (1.51%) | ko04022 | Environmental Information Processing | Signal transduction              |
| 49 | Tuberculosis                                    | 46 (1.51%) | ko05152 | Human Diseases                       | Infectious diseases: Bacterial   |
| 50 | Leukocyte transendothelial migration            | 46 (1.51%) | ko04670 | Organismal Systems                   | Immune system                    |
| 51 | Salmonella infection                            | 46 (1.51%) | ko05132 | Human Diseases                       | Infectious diseases: Bacterial   |
| 52 | Purine metabolism                               | 45 (1.47%) | ko00230 | Metabolism                           | Nucleotide metabolism            |
| 53 | NOD-like receptor signaling pathway             | 45 (1.47%) | ko04621 | Organismal Systems                   | Immune system                    |
| 54 | Fluid shear stress and atherosclerosis          | 44 (1.44%) | ko05418 | Human Diseases                       | Cardiovascular diseases          |
| 55 | Ribosome biogenesis in eukaryotes               | 44 (1.44%) | ko03008 | Genetic Information Processing       | Translation                      |
| 56 | mTOR signaling pathway                          | 44 (1.44%) | ko04150 | Environmental Information Processing | Signal transduction              |
| 57 | Proteasome                                      | 44 (1.44%) | ko03050 | Genetic Information Processing       | Folding, sorting and degradation |
| 58 | Hepatocellular carcinoma                        | 43 (1.41%) | ko05225 | Human Diseases                       | Cancers: Specific types          |
| 59 | Pathogenic Escherichia coli infection           | 43 (1.41%) | ko05130 | Human Diseases                       | Infectious diseases: Bacterial   |
| 60 | Axon guidance                                   | 43 (1.41%) | ko04360 | Organismal Systems                   | Development                      |
| 61 | cAMP signaling pathway                          | 43 (1.41%) | ko04024 | Environmental Information Processing | Signal transduction              |
| 62 | Oocyte meiosis                                  | 43 (1.41%) | ko04114 | Cellular Processes                   | Cell growth and death            |
| 63 | Chemokine signaling pathway                     | 43 (1.41%) | ko04062 | Organismal Systems                   | Immune system                    |
| 64 | Hepatitis B                                     | 42 (1.37%) | ko05161 | Human Diseases                       | Infectious diseases: Viral       |
| 65 | Insulin signaling pathway                       | 42 (1.37%) | ko04910 | Organismal Systems                   | Endocrine system                 |
| 66 | Oxytocin signaling pathway                      | 41 (1.34%) | ko04921 | Organismal Systems                   | Endocrine system                 |
| 67 | Autophagy - animal                              | 40 (1.31%) | ko04140 | Cellular Processes                   | Transport and catabolism         |

|     |                                                      |            |         |                                      |                                           |
|-----|------------------------------------------------------|------------|---------|--------------------------------------|-------------------------------------------|
| 68  | Dilated cardiomyopathy (DCM)                         | 40 (1.31%) | ko05414 | Human Diseases                       | Cardiovascular diseases                   |
| 69  | Sphingolipid signaling pathway                       | 40 (1.31%) | ko04071 | Environmental Information Processing | Signal transduction                       |
| 70  | Shigellosis                                          | 40 (1.31%) | ko05131 | Human Diseases                       | Infectious diseases: Bacterial            |
| 71  | Valine, leucine and isoleucine degradation           | 40 (1.31%) | ko00280 | Metabolism                           | Amino acid metabolism                     |
| 72  | Glycolysis / Gluconeogenesis                         | 38 (1.24%) | ko00010 | Metabolism                           | Carbohydrate metabolism                   |
| 73  | Adherens junction                                    | 37 (1.21%) | ko04520 | Cellular Processes                   | Cellular community - eukaryotes           |
| 74  | RNA degradation                                      | 37 (1.21%) | ko03018 | Genetic Information Processing       | Folding, sorting and degradation          |
| 75  | Cardiac muscle contraction                           | 37 (1.21%) | ko04260 | Organismal Systems                   | Circulatory system                        |
| 76  | Alcoholism                                           | 36 (1.18%) | ko05034 | Human Diseases                       | Substance dependence                      |
| 77  | Complement and coagulation cascades                  | 36 (1.18%) | ko04610 | Organismal Systems                   | Immune system                             |
| 78  | Cell cycle                                           | 36 (1.18%) | ko04110 | Cellular Processes                   | Cell growth and death                     |
| 79  | Toxoplasmosis                                        | 36 (1.18%) | ko05145 | Human Diseases                       | Infectious diseases: Parasitic            |
| 80  | Apelin signaling pathway                             | 36 (1.18%) | ko04371 | Environmental Information Processing | Signal transduction                       |
| 81  | Hypertrophic cardiomyopathy (HCM)                    | 36 (1.18%) | ko05410 | Human Diseases                       | Cardiovascular diseases                   |
| 82  | HIF-1 signaling pathway                              | 35 (1.15%) | ko04066 | Environmental Information Processing | Signal transduction                       |
| 83  | Fc gamma R-mediated phagocytosis                     | 35 (1.15%) | ko04666 | Organismal Systems                   | Immune system                             |
| 84  | Dopaminergic synapse                                 | 35 (1.15%) | ko04728 | Organismal Systems                   | Nervous system                            |
| 85  | Neurotrophin signaling pathway                       | 34 (1.11%) | ko04722 | Organismal Systems                   | Nervous system                            |
| 86  | Amoebiasis                                           | 34 (1.11%) | ko05146 | Human Diseases                       | Infectious diseases: Parasitic            |
| 87  | Amino sugar and nucleotide sugar metabolism          | 33 (1.08%) | ko00520 | Metabolism                           | Carbohydrate metabolism                   |
| 88  | ECM-receptor interaction                             | 33 (1.08%) | ko04512 | Environmental Information Processing | Signaling molecules and interaction       |
| 89  | AGE-RAGE signaling pathway in diabetic complications | 33 (1.08%) | ko04933 | Human Diseases                       | Endocrine and metabolic diseases          |
| 90  | Measles                                              | 32 (1.05%) | ko05162 | Human Diseases                       | Infectious diseases: Viral                |
| 91  | Vibrio cholerae infection                            | 32 (1.05%) | ko05110 | Human Diseases                       | Infectious diseases: Bacterial            |
| 92  | MAPK signaling pathway - fly                         | 32 (1.05%) | ko04013 | Environmental Information Processing | Signal transduction                       |
| 93  | Legionellosis                                        | 32 (1.05%) | ko05134 | Human Diseases                       | Infectious diseases: Bacterial            |
| 94  | AMPK signaling pathway                               | 32 (1.05%) | ko04152 | Environmental Information Processing | Signal transduction                       |
| 95  | Fatty acid metabolism                                | 31 (1.01%) | ko01212 | Metabolism                           | Global and overview maps                  |
| 96  | Vascular smooth muscle contraction                   | 31 (1.01%) | ko04270 | Organismal Systems                   | Circulatory system                        |
| 97  | Relaxin signaling pathway                            | 30 (0.98%) | ko04926 | Organismal Systems                   | Endocrine system                          |
| 98  | Cushing syndrome                                     | 30 (0.98%) | ko04934 | Human Diseases                       | Endocrine and metabolic diseases          |
| 99  | Calcium signaling pathway                            | 30 (0.98%) | ko04020 | Environmental Information Processing | Signal transduction                       |
| 100 | Wnt signaling pathway                                | 30 (0.98%) | ko04310 | Environmental Information Processing | Signal transduction                       |
| 101 | Hippo signaling pathway - fly                        | 30 (0.98%) | ko04391 | Environmental Information Processing | Signal transduction                       |
| 102 | Drug metabolism - other enzymes                      | 29 (0.95%) | ko00983 | Metabolism                           | Xenobiotics biodegradation and metabolism |

|     |                                                            |            |         |                                      |                                     |
|-----|------------------------------------------------------------|------------|---------|--------------------------------------|-------------------------------------|
| 103 | Pyruvate metabolism                                        | 29 (0.95%) | ko00620 | Metabolism                           | Carbohydrate metabolism             |
| 104 | Phospholipase D signaling pathway                          | 29 (0.95%) | ko04072 | Environmental Information Processing | Signal transduction                 |
| 105 | Aminoacyl-tRNA biosynthesis                                | 29 (0.95%) | ko00970 | Genetic Information Processing       | Translation                         |
| 106 | Viral myocarditis                                          | 29 (0.95%) | ko05416 | Human Diseases                       | Cardiovascular diseases             |
| 107 | Fatty acid degradation                                     | 28 (0.92%) | ko00071 | Metabolism                           | Lipid metabolism                    |
| 108 | Epithelial cell signaling in Helicobacter pylori infection | 28 (0.92%) | ko05120 | Human Diseases                       | Infectious diseases: Bacterial      |
| 109 | Arrhythmogenic right ventricular cardiomyopathy (ARVC)     | 28 (0.92%) | ko05412 | Human Diseases                       | Cardiovascular diseases             |
| 110 | Gap junction                                               | 28 (0.92%) | ko04540 | Cellular Processes                   | Cellular community - eukaryotes     |
| 111 | Citrate cycle (TCA cycle)                                  | 28 (0.92%) | ko00020 | Metabolism                           | Carbohydrate metabolism             |
| 112 | Chagas disease (American trypanosomiasis)                  | 28 (0.92%) | ko05142 | Human Diseases                       | Infectious diseases: Parasitic      |
| 113 | Cysteine and methionine metabolism                         | 27 (0.88%) | ko00270 | Metabolism                           | Amino acid metabolism               |
| 114 | Renal cell carcinoma                                       | 27 (0.88%) | ko05211 | Human Diseases                       | Cancers: Specific types             |
| 115 | Thyroid hormone signaling pathway                          | 27 (0.88%) | ko04919 | Organismal Systems                   | Endocrine system                    |
| 116 | Synaptic vesicle cycle                                     | 27 (0.88%) | ko04721 | Organismal Systems                   | Nervous system                      |
| 117 | IL-17 signaling pathway                                    | 27 (0.88%) | ko04657 | Organismal Systems                   | Immune system                       |
| 118 | C-type lectin receptor signaling pathway                   | 27 (0.88%) | ko04625 | Organismal Systems                   | Immune system                       |
| 119 | Antigen processing and presentation                        | 27 (0.88%) | ko04612 | Organismal Systems                   | Immune system                       |
| 120 | Chronic myeloid leukemia                                   | 26 (0.85%) | ko05220 | Human Diseases                       | Cancers: Specific types             |
| 121 | Glucagon signaling pathway                                 | 26 (0.85%) | ko04922 | Organismal Systems                   | Endocrine system                    |
| 122 | Glutathione metabolism                                     | 26 (0.85%) | ko00480 | Metabolism                           | Metabolism of other amino acids     |
| 123 | Platinum drug resistance                                   | 25 (0.82%) | ko01524 | Human Diseases                       | Drug resistance: Antineoplastic     |
| 124 | Arginine and proline metabolism                            | 25 (0.82%) | ko00330 | Metabolism                           | Amino acid metabolism               |
| 125 | Gastric cancer                                             | 25 (0.82%) | ko05226 | Human Diseases                       | Cancers: Specific types             |
| 126 | Pertussis                                                  | 25 (0.82%) | ko05133 | Human Diseases                       | Infectious diseases: Bacterial      |
| 127 | Colorectal cancer                                          | 25 (0.82%) | ko05210 | Human Diseases                       | Cancers: Specific types             |
| 128 | GnRH signaling pathway                                     | 25 (0.82%) | ko04912 | Organismal Systems                   | Endocrine system                    |
| 129 | TNF signaling pathway                                      | 25 (0.82%) | ko04668 | Environmental Information Processing | Signal transduction                 |
| 130 | Transcriptional misregulation in cancer                    | 25 (0.82%) | ko05202 | Human Diseases                       | Cancers: Overview                   |
| 131 | Central carbon metabolism in cancer                        | 25 (0.82%) | ko05230 | Human Diseases                       | Cancers: Overview                   |
| 132 | Cell adhesion molecules (CAMs)                             | 25 (0.82%) | ko04514 | Environmental Information Processing | Signaling molecules and interaction |
| 133 | Pyrimidine metabolism                                      | 24 (0.79%) | ko00240 | Metabolism                           | Nucleotide metabolism               |
| 134 | Small cell lung cancer                                     | 24 (0.79%) | ko05222 | Human Diseases                       | Cancers: Specific types             |
| 135 | Lysine degradation                                         | 24 (0.79%) | ko00310 | Metabolism                           | Amino acid metabolism               |
| 136 | Peroxisome                                                 | 24 (0.79%) | ko04146 | Cellular Processes                   | Transport and catabolism            |

|     |                                                     |            |         |                                      |                                  |
|-----|-----------------------------------------------------|------------|---------|--------------------------------------|----------------------------------|
| 137 | FoxO signaling pathway                              | 24 (0.79%) | ko04068 | Environmental Information Processing | Signal transduction              |
| 138 | T cell receptor signaling pathway                   | 24 (0.79%) | ko04660 | Organismal Systems                   | Immune system                    |
| 139 | Systemic lupus erythematosus                        | 24 (0.79%) | ko05322 | Human Diseases                       | Immune diseases                  |
| 140 | Toll-like receptor signaling pathway                | 23 (0.75%) | ko04620 | Organismal Systems                   | Immune system                    |
| 141 | Long-term potentiation                              | 23 (0.75%) | ko04720 | Organismal Systems                   | Nervous system                   |
| 142 | NF-kappa B signaling pathway                        | 23 (0.75%) | ko04064 | Environmental Information Processing | Signal transduction              |
| 143 | Insulin resistance                                  | 23 (0.75%) | ko04931 | Human Diseases                       | Endocrine and metabolic diseases |
| 144 | Propanoate metabolism                               | 23 (0.75%) | ko00640 | Metabolism                           | Carbohydrate metabolism          |
| 145 | Pancreatic cancer                                   | 23 (0.75%) | ko05212 | Human Diseases                       | Cancers: Specific types          |
| 146 | Progesterone-mediated oocyte maturation             | 23 (0.75%) | ko04914 | Organismal Systems                   | Endocrine system                 |
| 147 | Longevity regulating pathway - worm                 | 23 (0.75%) | ko04212 | Organismal Systems                   | Aging                            |
| 148 | Ferroptosis                                         | 23 (0.75%) | ko04216 | Cellular Processes                   | Cell growth and death            |
| 149 | p53 signaling pathway                               | 22 (0.72%) | ko04115 | Cellular Processes                   | Cell growth and death            |
| 150 | Osteoclast differentiation                          | 22 (0.72%) | ko04380 | Organismal Systems                   | Development                      |
| 151 | Glutamatergic synapse                               | 22 (0.72%) | ko04724 | Organismal Systems                   | Nervous system                   |
| 152 | ErbB signaling pathway                              | 22 (0.72%) | ko04012 | Environmental Information Processing | Signal transduction              |
| 153 | Cholinergic synapse                                 | 21 (0.69%) | ko04725 | Organismal Systems                   | Nervous system                   |
| 154 | Serotonergic synapse                                | 21 (0.69%) | ko04726 | Organismal Systems                   | Nervous system                   |
| 155 | Mitophagy - animal                                  | 21 (0.69%) | ko04137 | Cellular Processes                   | Transport and catabolism         |
| 156 | Prostate cancer                                     | 21 (0.69%) | ko05215 | Human Diseases                       | Cancers: Specific types          |
| 157 | PPAR signaling pathway                              | 21 (0.69%) | ko03320 | Organismal Systems                   | Endocrine system                 |
| 158 | Inflammatory mediator regulation of TRP channels    | 20 (0.65%) | ko04750 | Organismal Systems                   | Sensory system                   |
| 159 | Apoptosis - fly                                     | 20 (0.65%) | ko04214 | Cellular Processes                   | Cell growth and death            |
| 160 | Vasopressin-regulated water reabsorption            | 20 (0.65%) | ko04962 | Organismal Systems                   | Excretory system                 |
| 161 | Protein export                                      | 20 (0.65%) | ko03060 | Genetic Information Processing       | Folding, sorting and degradation |
| 162 | Glioma                                              | 20 (0.65%) | ko05214 | Human Diseases                       | Cancers: Specific types          |
| 163 | DNA replication                                     | 20 (0.65%) | ko03030 | Genetic Information Processing       | Replication and repair           |
| 164 | EGFR tyrosine kinase inhibitor resistance           | 20 (0.65%) | ko01521 | Human Diseases                       | Drug resistance: Antineoplastic  |
| 165 | Acute myeloid leukemia                              | 20 (0.65%) | ko05221 | Human Diseases                       | Cancers: Specific types          |
| 166 | Parathyroid hormone synthesis, secretion and action | 20 (0.65%) | ko04928 | Organismal Systems                   | Endocrine system                 |
| 167 | Pentose phosphate pathway                           | 19 (0.62%) | ko00030 | Metabolism                           | Carbohydrate metabolism          |
| 168 | Longevity regulating pathway                        | 19 (0.62%) | ko04211 | Organismal Systems                   | Aging                            |
| 169 | Aldosterone synthesis and secretion                 | 19 (0.62%) | ko04925 | Organismal Systems                   | Endocrine system                 |
| 170 | Protein digestion and absorption                    | 19 (0.62%) | ko04974 | Organismal Systems                   | Digestive system                 |

|            |                                                          |            |         |                                      |                                           |
|------------|----------------------------------------------------------|------------|---------|--------------------------------------|-------------------------------------------|
| <b>171</b> | Choline metabolism in cancer                             | 19 (0.62%) | ko05231 | Human Diseases                       | Cancers: Overview                         |
| <b>172</b> | Cholesterol metabolism                                   | 19 (0.62%) | ko04979 | Organismal Systems                   | Digestive system                          |
| <b>173</b> | B cell receptor signaling pathway                        | 19 (0.62%) | ko04662 | Organismal Systems                   | Immune system                             |
| <b>174</b> | Pancreatic secretion                                     | 19 (0.62%) | ko04972 | Organismal Systems                   | Digestive system                          |
| <b>175</b> | Salivary secretion                                       | 19 (0.62%) | ko04970 | Organismal Systems                   | Digestive system                          |
| <b>176</b> | Long-term depression                                     | 19 (0.62%) | ko04730 | Organismal Systems                   | Nervous system                            |
| <b>177</b> | Natural killer cell mediated cytotoxicity                | 19 (0.62%) | ko04650 | Organismal Systems                   | Immune system                             |
| <b>178</b> | Rheumatoid arthritis                                     | 19 (0.62%) | ko05323 | Human Diseases                       | Immune diseases                           |
| <b>179</b> | Alanine, aspartate and glutamate metabolism              | 18 (0.59%) | ko00250 | Metabolism                           | Amino acid metabolism                     |
| <b>180</b> | Gastric acid secretion                                   | 18 (0.59%) | ko04971 | Organismal Systems                   | Digestive system                          |
| <b>181</b> | Breast cancer                                            | 18 (0.59%) | ko05224 | Human Diseases                       | Cancers: Specific types                   |
| <b>182</b> | Endocrine resistance                                     | 18 (0.59%) | ko01522 | Human Diseases                       | Drug resistance: Antineoplastic           |
| <b>183</b> | Longevity regulating pathway - multiple species          | 18 (0.59%) | ko04213 | Organismal Systems                   | Aging                                     |
| <b>184</b> | Circadian entrainment                                    | 18 (0.59%) | ko04713 | Organismal Systems                   | Environmental adaptation                  |
| <b>185</b> | Amyotrophic lateral sclerosis (ALS)                      | 18 (0.59%) | ko05014 | Human Diseases                       | Neurodegenerative diseases                |
| <b>186</b> | Fructose and mannose metabolism                          | 18 (0.59%) | ko00051 | Metabolism                           | Carbohydrate metabolism                   |
| <b>187</b> | Phosphatidylinositol signaling system                    | 18 (0.59%) | ko04070 | Environmental Information Processing | Signal transduction                       |
| <b>188</b> | Glyoxylate and dicarboxylate metabolism                  | 18 (0.59%) | ko00630 | Metabolism                           | Carbohydrate metabolism                   |
| <b>189</b> | Melanogenesis                                            | 18 (0.59%) | ko04916 | Organismal Systems                   | Endocrine system                          |
| <b>190</b> | VEGF signaling pathway                                   | 18 (0.59%) | ko04370 | Environmental Information Processing | Signal transduction                       |
| <b>191</b> | Endometrial cancer                                       | 17 (0.56%) | ko05213 | Human Diseases                       | Cancers: Specific types                   |
| <b>192</b> | Fc epsilon RI signaling pathway                          | 17 (0.56%) | ko04664 | Organismal Systems                   | Immune system                             |
| <b>193</b> | Nucleotide excision repair                               | 17 (0.56%) | ko03420 | Genetic Information Processing       | Replication and repair                    |
| <b>194</b> | Thyroid cancer                                           | 17 (0.56%) | ko05216 | Human Diseases                       | Cancers: Specific types                   |
| <b>195</b> | Prolactin signaling pathway                              | 17 (0.56%) | ko04917 | Organismal Systems                   | Endocrine system                          |
| <b>196</b> | Metabolism of xenobiotics by cytochrome P450             | 17 (0.56%) | ko00980 | Metabolism                           | Xenobiotics biodegradation and metabolism |
| <b>197</b> | Tryptophan metabolism                                    | 16 (0.52%) | ko00380 | Metabolism                           | Amino acid metabolism                     |
| <b>198</b> | Th17 cell differentiation                                | 16 (0.52%) | ko04659 | Organismal Systems                   | Immune system                             |
| <b>199</b> | Toll and Imd signaling pathway                           | 16 (0.52%) | ko04624 | Organismal Systems                   | Immune system                             |
| <b>200</b> | Signaling pathways regulating pluripotency of stem cells | 16 (0.52%) | ko04550 | Cellular Processes                   | Cellular community - eukaryotes           |
| <b>201</b> | TGF-beta signaling pathway                               | 16 (0.52%) | ko04350 | Environmental Information Processing | Signal transduction                       |
| <b>202</b> | GABAergic synapse                                        | 16 (0.52%) | ko04727 | Organismal Systems                   | Nervous system                            |
| <b>203</b> | Mismatch repair                                          | 16 (0.52%) | ko03430 | Genetic Information Processing       | Replication and repair                    |

|     |                                                           |            |         |                                      |                                           |
|-----|-----------------------------------------------------------|------------|---------|--------------------------------------|-------------------------------------------|
| 204 | Inositol phosphate metabolism                             | 16 (0.52%) | ko00562 | Metabolism                           | Carbohydrate metabolism                   |
| 205 | beta-Alanine metabolism                                   | 16 (0.52%) | ko00410 | Metabolism                           | Metabolism of other amino acids           |
| 206 | Endocrine and other factor-regulated calcium reabsorption | 16 (0.52%) | ko04961 | Organismal Systems                   | Excretory system                          |
| 207 | Galactose metabolism                                      | 15 (0.49%) | ko00052 | Metabolism                           | Carbohydrate metabolism                   |
| 208 | Leishmaniasis                                             | 15 (0.49%) | ko05140 | Human Diseases                       | Infectious diseases: Parasitic            |
| 209 | Non-small cell lung cancer                                | 15 (0.49%) | ko05223 | Human Diseases                       | Cancers: Specific types                   |
| 210 | Thyroid hormone synthesis                                 | 15 (0.49%) | ko04918 | Organismal Systems                   | Endocrine system                          |
| 211 | Jak-STAT signaling pathway                                | 15 (0.49%) | ko04630 | Environmental Information Processing | Signal transduction                       |
| 212 | Mineral absorption                                        | 15 (0.49%) | ko04978 | Organismal Systems                   | Digestive system                          |
| 213 | Chemical carcinogenesis                                   | 15 (0.49%) | ko05204 | Human Diseases                       | Cancers: Overview                         |
| 214 | Glycerophospholipid metabolism                            | 15 (0.49%) | ko00564 | Metabolism                           | Lipid metabolism                          |
| 215 | Adipocytokine signaling pathway                           | 14 (0.46%) | ko04920 | Organismal Systems                   | Endocrine system                          |
| 216 | Phototransduction - fly                                   | 14 (0.46%) | ko04745 | Organismal Systems                   | Sensory system                            |
| 217 | Butanoate metabolism                                      | 14 (0.46%) | ko00650 | Metabolism                           | Carbohydrate metabolism                   |
| 218 | Melanoma                                                  | 14 (0.46%) | ko05218 | Human Diseases                       | Cancers: Specific types                   |
| 219 | Renin secretion                                           | 14 (0.46%) | ko04924 | Organismal Systems                   | Endocrine system                          |
| 220 | Insulin secretion                                         | 13 (0.43%) | ko04911 | Organismal Systems                   | Endocrine system                          |
| 221 | Porphyrin and chlorophyll metabolism                      | 13 (0.43%) | ko00860 | Metabolism                           | Metabolism of cofactors and vitamins      |
| 222 | Amphetamine addiction                                     | 13 (0.43%) | ko05031 | Human Diseases                       | Substance dependence                      |
| 223 | Fatty acid elongation                                     | 13 (0.43%) | ko00062 | Metabolism                           | Lipid metabolism                          |
| 224 | SNARE interactions in vesicular transport                 | 13 (0.43%) | ko04130 | Genetic Information Processing       | Folding, sorting and degradation          |
| 225 | RIG-I-like receptor signaling pathway                     | 13 (0.43%) | ko04622 | Organismal Systems                   | Immune system                             |
| 226 | Bladder cancer                                            | 13 (0.43%) | ko05219 | Human Diseases                       | Cancers: Specific types                   |
| 227 | Glycerolipid metabolism                                   | 12 (0.39%) | ko00561 | Metabolism                           | Lipid metabolism                          |
| 228 | African trypanosomiasis                                   | 12 (0.39%) | ko05143 | Human Diseases                       | Infectious diseases: Parasitic            |
| 229 | Hematopoietic cell lineage                                | 12 (0.39%) | ko04640 | Organismal Systems                   | Immune system                             |
| 230 | Drug metabolism - cytochrome P450                         | 12 (0.39%) | ko00982 | Metabolism                           | Xenobiotics biodegradation and metabolism |
| 231 | Neuroactive ligand-receptor interaction                   | 12 (0.39%) | ko04080 | Environmental Information Processing | Signaling molecules and interaction       |
| 232 | 2-Oxocarboxylic acid metabolism                           | 12 (0.39%) | ko01210 | Metabolism                           | Global and overview maps                  |
| 233 | Tyrosine metabolism                                       | 12 (0.39%) | ko00350 | Metabolism                           | Amino acid metabolism                     |
| 234 | Glycine, serine and threonine metabolism                  | 12 (0.39%) | ko00260 | Metabolism                           | Amino acid metabolism                     |
| 235 | Terpenoid backbone biosynthesis                           | 11 (0.36%) | ko00900 | Metabolism                           | Metabolism of terpenoids and polyketides  |



|     |                                           |            |         |                                      |                                      |
|-----|-------------------------------------------|------------|---------|--------------------------------------|--------------------------------------|
| 236 | N-Glycan biosynthesis                     | 11 (0.36%) | ko00510 | Metabolism                           | Glycan biosynthesis and metabolism   |
| 237 | Apoptosis - multiple species              | 11 (0.36%) | ko04215 | Cellular Processes                   | Cell growth and death                |
| 238 | Morphine addiction                        | 11 (0.36%) | ko05032 | Human Diseases                       | Substance dependence                 |
| 239 | Base excision repair                      | 11 (0.36%) | ko03410 | Genetic Information Processing       | Replication and repair               |
| 240 | Staphylococcus aureus infection           | 11 (0.36%) | ko05150 | Human Diseases                       | Infectious diseases: Bacterial       |
| 241 | Prion diseases                            | 11 (0.36%) | ko05020 | Human Diseases                       | Neurodegenerative diseases           |
| 242 | Autophagy - other                         | 11 (0.36%) | ko04136 | Cellular Processes                   | Transport and catabolism             |
| 243 | Collecting duct acid secretion            | 11 (0.36%) | ko04966 | Organismal Systems                   | Excretory system                     |
| 244 | Cytosolic DNA-sensing pathway             | 11 (0.36%) | ko04623 | Organismal Systems                   | Immune system                        |
| 245 | Olfactory transduction                    | 10 (0.33%) | ko04740 | Organismal Systems                   | Sensory system                       |
| 246 | Arachidonic acid metabolism               | 10 (0.33%) | ko00590 | Metabolism                           | Lipid metabolism                     |
| 247 | Bile secretion                            | 10 (0.33%) | ko04976 | Organismal Systems                   | Digestive system                     |
| 248 | Ether lipid metabolism                    | 10 (0.33%) | ko00565 | Metabolism                           | Lipid metabolism                     |
| 249 | Biosynthesis of unsaturated fatty acids   | 10 (0.33%) | ko01040 | Metabolism                           | Lipid metabolism                     |
| 250 | Th1 and Th2 cell differentiation          | 10 (0.33%) | ko04658 | Organismal Systems                   | Immune system                        |
| 251 | Starch and sucrose metabolism             | 10 (0.33%) | ko00500 | Metabolism                           | Carbohydrate metabolism              |
| 252 | Steroid biosynthesis                      | 9 (0.29%)  | ko00100 | Metabolism                           | Lipid metabolism                     |
| 253 | Aldosterone-regulated sodium reabsorption | 9 (0.29%)  | ko04960 | Organismal Systems                   | Excretory system                     |
| 254 | Proximal tubule bicarbonate reclamation   | 9 (0.29%)  | ko04964 | Organismal Systems                   | Excretory system                     |
| 255 | Malaria                                   | 9 (0.29%)  | ko05144 | Human Diseases                       | Infectious diseases: Parasitic       |
| 256 | Nicotinate and nicotinamide metabolism    | 9 (0.29%)  | ko00760 | Metabolism                           | Metabolism of cofactors and vitamins |
| 257 | Sphingolipid metabolism                   | 9 (0.29%)  | ko00600 | Metabolism                           | Lipid metabolism                     |
| 258 | Cocaine addiction                         | 9 (0.29%)  | ko05030 | Human Diseases                       | Substance dependence                 |
| 259 | Notch signaling pathway                   | 8 (0.26%)  | ko04330 | Environmental Information Processing | Signal transduction                  |
| 260 | Type II diabetes mellitus                 | 8 (0.26%)  | ko04930 | Human Diseases                       | Endocrine and metabolic diseases     |
| 261 | One carbon pool by folate                 | 8 (0.26%)  | ko00670 | Metabolism                           | Metabolism of cofactors and vitamins |
| 262 | Regulation of lipolysis in adipocytes     | 8 (0.26%)  | ko04923 | Organismal Systems                   | Endocrine system                     |
| 263 | Arginine biosynthesis                     | 8 (0.26%)  | ko00220 | Metabolism                           | Amino acid metabolism                |
| 264 | Pentose and glucuronate interconversions  | 8 (0.26%)  | ko00040 | Metabolism                           | Carbohydrate metabolism              |
| 265 | Cytokine-cytokine receptor interaction    | 8 (0.26%)  | ko04060 | Environmental Information Processing | Signaling molecules and interaction  |
| 266 | Histidine metabolism                      | 8 (0.26%)  | ko00340 | Metabolism                           | Amino acid metabolism                |
| 267 | Folate biosynthesis                       | 8 (0.26%)  | ko00790 | Metabolism                           | Metabolism of cofactors and vitamins |
| 268 | Antifolate resistance                     | 8 (0.26%)  | ko01523 | Human Diseases                       | Drug resistance: Antineoplastic      |

|     |                                                            |           |         |                                      |                                      |
|-----|------------------------------------------------------------|-----------|---------|--------------------------------------|--------------------------------------|
| 269 | RNA polymerase                                             | 8 (0.26%) | ko03020 | Genetic Information Processing       | Transcription                        |
| 270 | Cortisol synthesis and secretion                           | 7 (0.23%) | ko04927 | Organismal Systems                   | Endocrine system                     |
| 271 | Dorso-ventral axis formation                               | 7 (0.23%) | ko04320 | Organismal Systems                   | Development                          |
| 272 | Inflammatory bowel disease (IBD)                           | 7 (0.23%) | ko05321 | Human Diseases                       | Immune diseases                      |
| 273 | Ascorbate and aldarate metabolism                          | 7 (0.23%) | ko00053 | Metabolism                           | Carbohydrate metabolism              |
| 274 | Sulfur metabolism                                          | 7 (0.23%) | ko00920 | Metabolism                           | Energy metabolism                    |
| 275 | Carbohydrate digestion and absorption                      | 7 (0.23%) | ko04973 | Organismal Systems                   | Digestive system                     |
| 276 | Hedgehog signaling pathway - fly                           | 7 (0.23%) | ko04341 | Environmental Information Processing | Signal transduction                  |
| 277 | Other glycan degradation                                   | 7 (0.23%) | ko00511 | Metabolism                           | Glycan biosynthesis and metabolism   |
| 278 | Glycosaminoglycan degradation                              | 6 (0.2%)  | ko00531 | Metabolism                           | Glycan biosynthesis and metabolism   |
| 279 | Other types of O-glycan biosynthesis                       | 6 (0.2%)  | ko00514 | Metabolism                           | Glycan biosynthesis and metabolism   |
| 280 | Synthesis and degradation of ketone bodies                 | 6 (0.2%)  | ko00072 | Metabolism                           | Lipid metabolism                     |
| 281 | Phenylalanine metabolism                                   | 6 (0.2%)  | ko00360 | Metabolism                           | Amino acid metabolism                |
| 282 | Fatty acid biosynthesis                                    | 6 (0.2%)  | ko00061 | Metabolism                           | Lipid metabolism                     |
| 283 | Allograft rejection                                        | 6 (0.2%)  | ko05330 | Human Diseases                       | Immune diseases                      |
| 284 | Hedgehog signaling pathway                                 | 6 (0.2%)  | ko04340 | Environmental Information Processing | Signal transduction                  |
| 285 | Renin-angiotensin system                                   | 6 (0.2%)  | ko04614 | Organismal Systems                   | Endocrine system                     |
| 286 | Selenocompound metabolism                                  | 6 (0.2%)  | ko00450 | Metabolism                           | Metabolism of other amino acids      |
| 287 | Autoimmune thyroid disease                                 | 6 (0.2%)  | ko05320 | Human Diseases                       | Immune diseases                      |
| 288 | Type I diabetes mellitus                                   | 6 (0.2%)  | ko04940 | Human Diseases                       | Endocrine and metabolic diseases     |
| 289 | Glycosphingolipid biosynthesis - globo and isoglobo series | 6 (0.2%)  | ko00603 | Metabolism                           | Glycan biosynthesis and metabolism   |
| 290 | Steroid hormone biosynthesis                               | 5 (0.16%) | ko00140 | Metabolism                           | Lipid metabolism                     |
| 291 | Thiamine metabolism                                        | 5 (0.16%) | ko00730 | Metabolism                           | Metabolism of cofactors and vitamins |
| 292 | Hippo signaling pathway - multiple species                 | 5 (0.16%) | ko04392 | Environmental Information Processing | Signal transduction                  |
| 293 | Ovarian steroidogenesis                                    | 5 (0.16%) | ko04913 | Organismal Systems                   | Endocrine system                     |
| 294 | Phototransduction                                          | 5 (0.16%) | ko04744 | Organismal Systems                   | Sensory system                       |
| 295 | Homologous recombination                                   | 5 (0.16%) | ko03440 | Genetic Information Processing       | Replication and repair               |
| 296 | Graft-versus-host disease                                  | 4 (0.13%) | ko05332 | Human Diseases                       | Immune diseases                      |
| 297 | Glycosylphosphatidylinositol (GPI)-anchor biosynthesis     | 4 (0.13%) | ko00563 | Metabolism                           | Glycan biosynthesis and metabolism   |
| 298 | Pantothenate and CoA biosynthesis                          | 4 (0.13%) | ko00770 | Metabolism                           | Metabolism of cofactors and vitamins |
| 299 | Taste transduction                                         | 4 (0.13%) | ko04742 | Organismal Systems                   | Sensory system                       |
| 300 | Basal transcription factors                                | 4 (0.13%) | ko03022 | Genetic Information Processing       | Transcription                        |
| 301 | Riboflavin metabolism                                      | 4 (0.13%) | ko00740 | Metabolism                           | Metabolism of cofactors and          |

|            |                                                     |           |         |                                |                                                |
|------------|-----------------------------------------------------|-----------|---------|--------------------------------|------------------------------------------------|
| <b>302</b> | Glycosphingolipid biosynthesis - ganglio series     | 4 (0.13%) | ko00604 | Metabolism                     | vitamins<br>Glycan biosynthesis and metabolism |
| <b>303</b> | alpha-Linolenic acid metabolism                     | 4 (0.13%) | ko00592 | Metabolism                     | Lipid metabolism                               |
| <b>304</b> | Circadian rhythm                                    | 3 (0.1%)  | ko04710 | Organismal Systems             | Environmental adaptation                       |
| <b>305</b> | Fanconi anemia pathway                              | 3 (0.1%)  | ko03460 | Genetic Information Processing | Replication and repair                         |
| <b>306</b> | Mucin type O-glycan biosynthesis                    | 3 (0.1%)  | ko00512 | Metabolism                     | Glycan biosynthesis and metabolism             |
| <b>307</b> | Primary bile acid biosynthesis                      | 3 (0.1%)  | ko00120 | Metabolism                     | Lipid metabolism                               |
| <b>308</b> | Primary immunodeficiency                            | 3 (0.1%)  | ko05340 | Human Diseases                 | Immune diseases                                |
| <b>309</b> | Phosphonate and phosphinate metabolism              | 3 (0.1%)  | ko00440 | Metabolism                     | Metabolism of other amino acids                |
| <b>310</b> | Insect hormone biosynthesis                         | 3 (0.1%)  | ko00981 | Metabolism                     | Metabolism of terpenoids and polyketides       |
| <b>311</b> | Fat digestion and absorption                        | 3 (0.1%)  | ko04975 | Organismal Systems             | Digestive system                               |
| <b>312</b> | Vitamin B6 metabolism                               | 3 (0.1%)  | ko00750 | Metabolism                     | Metabolism of cofactors and vitamins           |
| <b>313</b> | Basal cell carcinoma                                | 3 (0.1%)  | ko05217 | Human Diseases                 | Cancers: Specific types                        |
| <b>314</b> | Retinol metabolism                                  | 3 (0.1%)  | ko00830 | Metabolism                     | Metabolism of cofactors and vitamins           |
| <b>315</b> | Sulfur relay system                                 | 3 (0.1%)  | ko04122 | Genetic Information Processing | Folding, sorting and degradation               |
| <b>316</b> | Vitamin digestion and absorption                    | 3 (0.1%)  | ko04977 | Organismal Systems             | Digestive system                               |
| <b>317</b> | Nitrogen metabolism                                 | 3 (0.1%)  | ko00910 | Metabolism                     | Energy metabolism                              |
| <b>318</b> | Ubiquinone and other terpenoid-quinone biosynthesis | 2 (0.07%) | ko00130 | Metabolism                     | Metabolism of cofactors and vitamins           |
| <b>319</b> | D-Glutamine and D-glutamate metabolism              | 2 (0.07%) | ko00471 | Metabolism                     | Metabolism of other amino acids                |
| <b>320</b> | Phenylalanine, tyrosine and tryptophan biosynthesis | 2 (0.07%) | ko00400 | Metabolism                     | Amino acid metabolism                          |
| <b>321</b> | Asthma                                              | 2 (0.07%) | ko05310 | Human Diseases                 | Immune diseases                                |
| <b>322</b> | Neomycin, kanamycin and gentamicin biosynthesis     | 2 (0.07%) | ko00524 | Metabolism                     | Biosynthesis of other secondary metabolites    |
| <b>323</b> | Mannose type O-glycan biosynthesis                  | 2 (0.07%) | ko00515 | Metabolism                     | Glycan biosynthesis and metabolism             |
| <b>324</b> | Non-homologous end-joining                          | 2 (0.07%) | ko03450 | Genetic Information Processing | Replication and repair                         |
| <b>325</b> | Biotin metabolism                                   | 2 (0.07%) | ko00780 | Metabolism                     | Metabolism of cofactors and vitamins           |
| <b>326</b> | Nicotine addiction                                  | 2 (0.07%) | ko05033 | Human Diseases                 | Substance dependence                           |
| <b>327</b> | Intestinal immune network for IgA production        | 2 (0.07%) | ko04672 | Organismal Systems             | Immune system                                  |
| <b>328</b> | Cutin, suberine and wax biosynthesis                | 2 (0.07%) | ko00073 | Metabolism                     | Lipid metabolism                               |

|            |                                                                         |           |         |                                      |                                             |
|------------|-------------------------------------------------------------------------|-----------|---------|--------------------------------------|---------------------------------------------|
| <b>329</b> | Caffeine metabolism                                                     | 1 (0.03%) | ko00232 | Metabolism                           | Biosynthesis of other secondary metabolites |
| <b>330</b> | Valine, leucine and isoleucine biosynthesis                             | 1 (0.03%) | ko00290 | Metabolism                           | Amino acid metabolism                       |
| <b>331</b> | Linoleic acid metabolism                                                | 1 (0.03%) | ko00591 | Metabolism                           | Lipid metabolism                            |
| <b>332</b> | Glycosaminoglycan biosynthesis - heparan sulfate / heparin              | 1 (0.03%) | ko00534 | Metabolism                           | Glycan biosynthesis and metabolism          |
| <b>333</b> | Taurine and hypotaurine metabolism                                      | 1 (0.03%) | ko00430 | Metabolism                           | Metabolism of other amino acids             |
| <b>334</b> | Glycosaminoglycan biosynthesis - chondroitin sulfate / dermatan sulfate | 1 (0.03%) | ko00532 | Metabolism                           | Glycan biosynthesis and metabolism          |
| <b>335</b> | Monobactam biosynthesis                                                 | 1 (0.03%) | ko00261 | Metabolism                           | Biosynthesis of other secondary metabolites |
| <b>336</b> | Circadian rhythm - fly                                                  | 1 (0.03%) | ko04711 | Organismal Systems                   | Environmental adaptation                    |
| <b>337</b> | ABC transporters                                                        | 1 (0.03%) | ko02010 | Environmental Information Processing | Membrane transport                          |

**Table S2. Identified DEPs in *IRS1* silenced GMECs**

| Primary_protein_ID             | ratio    | P value  | Class | Description                                                                       |
|--------------------------------|----------|----------|-------|-----------------------------------------------------------------------------------|
| tr A0A8C2P961 A0A8C2P961_CAPHI | 1.679766 | 0.00638  | Up    | Uncharacterized protein OS=Capra hircus OX=9925 PE=4 SV=1                         |
| tr A0A452GAM5 A0A452GAM5_CAPHI | 80.58179 | 0.007151 | Up    | Keratin 82 OS=Capra hircus OX=9925 GN=KRT82 PE=3 SV=1                             |
| tr A0A452EY08 A0A452EY08_CAPHI | 0.651776 | 0.018808 | Down  | Protein arginine N-methyltransferase 5 OS=Capra hircus OX=9925 GN=PRMT5 PE=3 SV=1 |
| tr A0A8C2S8I8 A0A8C2S8I8_CAPHI | 6.440772 | 0.019999 | Up    | MAP7 domain containing 1 OS=Capra hircus OX=9925 PE=4 SV=1                        |
| tr A0A452ENI2 A0A452ENI2_CAPHI | 1.794928 | 0.021819 | Up    | Syntaxin 7 OS=Capra hircus OX=9925 GN=STX7 PE=3 SV=1                              |
| tr A0A452FPA3 A0A452FPA3_CAPHI | 2.205146 | 0.025801 | Up    | KIAA1217 ortholog OS=Capra hircus OX=9925 GN=KIAA1217 PE=4 SV=1                   |
| tr A0A8C2SJN8 A0A8C2SJN8_CAPHI | 1.598218 | 0.027044 | Up    | Phosphodiesterase 12 OS=Capra hircus OX=9925 GN=PDE12 PE=4 SV=1                   |
| tr A0A8C2RAM0 A0A8C2RAM0_CAPHI | 0.431634 | 0.030581 | Down  | Glutaredoxin 5 OS=Capra hircus OX=9925 PE=4 SV=1                                  |
| tr A0A452EKV1 A0A452EKV1_CAPHI | 0.584772 | 0.033474 | Down  | Protein MAK16 homolog OS=Capra hircus OX=9925 PE=3 SV=1                           |
| tr A0A452FS44 A0A452FS44_CAPHI | 2.275074 | 0.038024 | Up    | Heme binding protein 2 OS=Capra hircus OX=9925 GN=HEBP2 PE=3 SV=1                 |
| tr A0A452E2T3 A0A452E2T3_CAPHI | 5.679159 | 0.043977 | Up    | Rhophilin Rho GTPase binding protein 2 OS=Capra hircus OX=9925 GN=RHPN2 PE=4 SV=1 |
| tr A0A8C2SL02 A0A8C2SL02_CAPHI | 1.63364  | 0.04659  | Up    | Myosin XVIIIa OS=Capra hircus OX=9925 PE=4 SV=1                                   |

**Table S3. GO enriched DEPs**

| <b>Ontology</b>    | <b>GO_term</b>                                | <b>Protein_ID</b>              | <b>log2Foldchange</b> | <b>Up/Down</b> |
|--------------------|-----------------------------------------------|--------------------------------|-----------------------|----------------|
| biological_process | biological regulation                         | tr A0A452E2T3 A0A452E2T3_CAPHI | 2.505677              | up             |
| biological_process | biological regulation                         | tr A0A452ENI2 A0A452ENI2_CAPHI | 0.843926              | up             |
| biological_process | biological regulation                         | tr A0A452EY08 A0A452EY08_CAPHI | -0.61755              | down           |
| biological_process | biological regulation                         | tr A0A452FS44 A0A452FS44_CAPHI | 1.185913              | up             |
| biological_process | biological regulation                         | tr A0A8C2P961 A0A8C2P961_CAPHI | 0.74826               | up             |
| biological_process | biological regulation                         | tr A0A8C2RAM0 A0A8C2RAM0_CAPHI | -1.21212              | down           |
| biological_process | biological regulation                         | tr A0A8C2SJN8 A0A8C2SJN8_CAPHI | 0.676464              | up             |
| biological_process | cell killing                                  | tr A0A452ENI2 A0A452ENI2_CAPHI | 0.843926              | up             |
| biological_process | cellular component organization or biogenesis | tr A0A452EKV1 A0A452EKV1_CAPHI | -0.77405              | down           |
| biological_process | cellular component organization or biogenesis | tr A0A452ENI2 A0A452ENI2_CAPHI | 0.843926              | up             |
| biological_process | cellular component organization or biogenesis | tr A0A452EY08 A0A452EY08_CAPHI | -0.61755              | down           |
| biological_process | cellular component organization or biogenesis | tr A0A452FS44 A0A452FS44_CAPHI | 1.185913              | up             |
| biological_process | cellular process                              | tr A0A452E2T3 A0A452E2T3_CAPHI | 2.505677              | up             |
| biological_process | cellular process                              | tr A0A452EKV1 A0A452EKV1_CAPHI | -0.77405              | down           |
| biological_process | cellular process                              | tr A0A452ENI2 A0A452ENI2_CAPHI | 0.843926              | up             |
| biological_process | cellular process                              | tr A0A452EY08 A0A452EY08_CAPHI | -0.61755              | down           |
| biological_process | cellular process                              | tr A0A452FS44 A0A452FS44_CAPHI | 1.185913              | up             |
| biological_process | cellular process                              | tr A0A8C2P961 A0A8C2P961_CAPHI | 0.74826               | up             |
| biological_process | cellular process                              | tr A0A8C2RAM0 A0A8C2RAM0_CAPHI | -1.21212              | down           |
| biological_process | cellular process                              | tr A0A8C2SJN8 A0A8C2SJN8_CAPHI | 0.676464              | up             |
| biological_process | developmental process                         | tr A0A452FPA3 A0A452FPA3_CAPHI | 1.140874              | up             |
| biological_process | developmental process                         | tr A0A8C2P961 A0A8C2P961_CAPHI | 0.74826               | up             |
| biological_process | immune system process                         | tr A0A452ENI2 A0A452ENI2_CAPHI | 0.843926              | up             |
| biological_process | immune system process                         | tr A0A8C2SJN8 A0A8C2SJN8_CAPHI | 0.676464              | up             |

|                    |                                           |                                |          |      |
|--------------------|-------------------------------------------|--------------------------------|----------|------|
| biological_process | localization                              | tr A0A452ENI2 A0A452ENI2_CAPHI | 0.843926 | up   |
| biological_process | localization                              | tr A0A452FS44 A0A452FS44_CAPHI | 1.185913 | up   |
| biological_process | metabolic process                         | tr A0A452EKV1 A0A452EKV1_CAPHI | -0.77405 | down |
| biological_process | metabolic process                         | tr A0A452EY08 A0A452EY08_CAPHI | -0.61755 | down |
| biological_process | metabolic process                         | tr A0A8C2P961 A0A8C2P961_CAPHI | 0.74826  | up   |
| biological_process | metabolic process                         | tr A0A8C2RAM0 A0A8C2RAM0_CAPHI | -1.21212 | down |
| biological_process | metabolic process                         | tr A0A8C2SJN8 A0A8C2SJN8_CAPHI | 0.676464 | up   |
| biological_process | multi-organism process                    | tr A0A8C2SJN8 A0A8C2SJN8_CAPHI | 0.676464 | up   |
| biological_process | multicellular organismal process          | tr A0A452EY08 A0A452EY08_CAPHI | -0.61755 | down |
| biological_process | multicellular organismal process          | tr A0A452FPA3 A0A452FPA3_CAPHI | 1.140874 | up   |
| biological_process | negative regulation of biological process | tr A0A8C2SJN8 A0A8C2SJN8_CAPHI | 0.676464 | up   |
| biological_process | positive regulation of biological process | tr A0A452ENI2 A0A452ENI2_CAPHI | 0.843926 | up   |
| biological_process | positive regulation of biological process | tr A0A452EY08 A0A452EY08_CAPHI | -0.61755 | down |
| biological_process | positive regulation of biological process | tr A0A452FS44 A0A452FS44_CAPHI | 1.185913 | up   |
| biological_process | positive regulation of biological process | tr A0A8C2P961 A0A8C2P961_CAPHI | 0.74826  | up   |
| biological_process | positive regulation of biological process | tr A0A8C2SJN8 A0A8C2SJN8_CAPHI | 0.676464 | up   |
| biological_process | regulation of biological process          | tr A0A452E2T3 A0A452E2T3_CAPHI | 2.505677 | up   |
| biological_process | regulation of biological process          | tr A0A452ENI2 A0A452ENI2_CAPHI | 0.843926 | up   |
| biological_process | regulation of biological process          | tr A0A452EY08 A0A452EY08_CAPHI | -0.61755 | down |
| biological_process | regulation of biological process          | tr A0A452FS44 A0A452FS44_CAPHI | 1.185913 | up   |
| biological_process | regulation of biological process          | tr A0A8C2P961 A0A8C2P961_CAPHI | 0.74826  | up   |
| biological_process | regulation of biological process          | tr A0A8C2RAM0 A0A8C2RAM0_CAPHI | -1.21212 | down |
| biological_process | regulation of biological process          | tr A0A8C2SJN8 A0A8C2SJN8_CAPHI | 0.676464 | up   |
| biological_process | response to stimulus                      | tr A0A452E2T3 A0A452E2T3_CAPHI | 2.505677 | up   |
| biological_process | response to stimulus                      | tr A0A452ENI2 A0A452ENI2_CAPHI | 0.843926 | up   |
| biological_process | response to stimulus                      | tr A0A452EY08 A0A452EY08_CAPHI | -0.61755 | down |

|                    |                      |                                |          |      |
|--------------------|----------------------|--------------------------------|----------|------|
| biological_process | response to stimulus | tr A0A8C2P961 A0A8C2P961_CAPHI | 0.74826  | up   |
| biological_process | response to stimulus | tr A0A8C2SJN8 A0A8C2SJN8_CAPHI | 0.676464 | up   |
| biological_process | rhythmic process     | tr A0A452EY08 A0A452EY08_CAPHI | -0.61755 | down |
| biological_process | signaling            | tr A0A452E2T3 A0A452E2T3_CAPHI | 2.505677 | up   |
| biological_process | signaling            | tr A0A452EY08 A0A452EY08_CAPHI | -0.61755 | down |
| cellular_component | cell                 | tr A0A452E2T3 A0A452E2T3_CAPHI | 2.505677 | up   |
| cellular_component | cell                 | tr A0A452EKV1 A0A452EKV1_CAPHI | -0.77405 | down |
| cellular_component | cell                 | tr A0A452ENI2 A0A452ENI2_CAPHI | 0.843926 | up   |
| cellular_component | cell                 | tr A0A452EY08 A0A452EY08_CAPHI | -0.61755 | down |
| cellular_component | cell                 | tr A0A452FS44 A0A452FS44_CAPHI | 1.185913 | up   |
| cellular_component | cell                 | tr A0A452GAM5 A0A452GAM5_CAPHI | 6.332382 | up   |
| cellular_component | cell                 | tr A0A8C2P961 A0A8C2P961_CAPHI | 0.74826  | up   |
| cellular_component | cell                 | tr A0A8C2RAM0 A0A8C2RAM0_CAPHI | -1.21212 | down |
| cellular_component | cell                 | tr A0A8C2SJN8 A0A8C2SJN8_CAPHI | 0.676464 | up   |
| cellular_component | cell part            | tr A0A452E2T3 A0A452E2T3_CAPHI | 2.505677 | up   |
| cellular_component | cell part            | tr A0A452EKV1 A0A452EKV1_CAPHI | -0.77405 | down |
| cellular_component | cell part            | tr A0A452ENI2 A0A452ENI2_CAPHI | 0.843926 | up   |
| cellular_component | cell part            | tr A0A452EY08 A0A452EY08_CAPHI | -0.61755 | down |
| cellular_component | cell part            | tr A0A452FS44 A0A452FS44_CAPHI | 1.185913 | up   |
| cellular_component | cell part            | tr A0A452GAM5 A0A452GAM5_CAPHI | 6.332382 | up   |
| cellular_component | cell part            | tr A0A8C2P961 A0A8C2P961_CAPHI | 0.74826  | up   |
| cellular_component | cell part            | tr A0A8C2RAM0 A0A8C2RAM0_CAPHI | -1.21212 | down |
| cellular_component | cell part            | tr A0A8C2SJN8 A0A8C2SJN8_CAPHI | 0.676464 | up   |
| cellular_component | extracellular region | tr A0A452ENI2 A0A452ENI2_CAPHI | 0.843926 | up   |
| cellular_component | extracellular region | tr A0A452FS44 A0A452FS44_CAPHI | 1.185913 | up   |
| cellular_component | extracellular region | tr A0A8C2P961 A0A8C2P961_CAPHI | 0.74826  | up   |



|                    |                           |                                |          |      |
|--------------------|---------------------------|--------------------------------|----------|------|
| cellular_component | extracellular region part | tr A0A452ENI2 A0A452ENI2_CAPHI | 0.843926 | up   |
| cellular_component | extracellular region part | tr A0A452FS44 A0A452FS44_CAPHI | 1.185913 | up   |
| cellular_component | extracellular region part | tr A0A8C2P961 A0A8C2P961_CAPHI | 0.74826  | up   |
| cellular_component | macromolecular complex    | tr A0A452EKV1 A0A452EKV1_CAPHI | -0.77405 | down |
| cellular_component | macromolecular complex    | tr A0A452ENI2 A0A452ENI2_CAPHI | 0.843926 | up   |
| cellular_component | macromolecular complex    | tr A0A452EY08 A0A452EY08_CAPHI | -0.61755 | down |
| cellular_component | membrane                  | tr A0A452ENI2 A0A452ENI2_CAPHI | 0.843926 | up   |
| cellular_component | membrane part             | tr A0A452ENI2 A0A452ENI2_CAPHI | 0.843926 | up   |
| cellular_component | membrane-enclosed lumen   | tr A0A452EKV1 A0A452EKV1_CAPHI | -0.77405 | down |
| cellular_component | membrane-enclosed lumen   | tr A0A452EY08 A0A452EY08_CAPHI | -0.61755 | down |
| cellular_component | membrane-enclosed lumen   | tr A0A8C2P961 A0A8C2P961_CAPHI | 0.74826  | up   |
| cellular_component | membrane-enclosed lumen   | tr A0A8C2RAM0 A0A8C2RAM0_CAPHI | -1.21212 | down |
| cellular_component | membrane-enclosed lumen   | tr A0A8C2SJN8 A0A8C2SJN8_CAPHI | 0.676464 | up   |
| cellular_component | organelle                 | tr A0A452EKV1 A0A452EKV1_CAPHI | -0.77405 | down |
| cellular_component | organelle                 | tr A0A452ENI2 A0A452ENI2_CAPHI | 0.843926 | up   |
| cellular_component | organelle                 | tr A0A452EY08 A0A452EY08_CAPHI | -0.61755 | down |
| cellular_component | organelle                 | tr A0A452FS44 A0A452FS44_CAPHI | 1.185913 | up   |
| cellular_component | organelle                 | tr A0A452GAM5 A0A452GAM5_CAPHI | 6.332382 | up   |
| cellular_component | organelle                 | tr A0A8C2P961 A0A8C2P961_CAPHI | 0.74826  | up   |
| cellular_component | organelle                 | tr A0A8C2RAM0 A0A8C2RAM0_CAPHI | -1.21212 | down |
| cellular_component | organelle                 | tr A0A8C2SJN8 A0A8C2SJN8_CAPHI | 0.676464 | up   |
| cellular_component | organelle part            | tr A0A452EKV1 A0A452EKV1_CAPHI | -0.77405 | down |
| cellular_component | organelle part            | tr A0A452ENI2 A0A452ENI2_CAPHI | 0.843926 | up   |
| cellular_component | organelle part            | tr A0A452EY08 A0A452EY08_CAPHI | -0.61755 | down |
| cellular_component | organelle part            | tr A0A452GAM5 A0A452GAM5_CAPHI | 6.332382 | up   |
| cellular_component | organelle part            | tr A0A8C2P961 A0A8C2P961_CAPHI | 0.74826  | up   |

|                    |                                  |                                |          |      |
|--------------------|----------------------------------|--------------------------------|----------|------|
| cellular_component | organelle part                   | tr A0A8C2RAM0 A0A8C2RAM0_CAPHI | -1.21212 | down |
| cellular_component | organelle part                   | tr A0A8C2SJN8 A0A8C2SJN8_CAPHI | 0.676464 | up   |
| cellular_component | supramolecular complex           | tr A0A452GAM5 A0A452GAM5_CAPHI | 6.332382 | up   |
| molecular_function | binding                          | tr A0A452EKV1 A0A452EKV1_CAPHI | -0.77405 | down |
| molecular_function | binding                          | tr A0A452ENI2 A0A452ENI2_CAPHI | 0.843926 | up   |
| molecular_function | binding                          | tr A0A452EY08 A0A452EY08_CAPHI | -0.61755 | down |
| molecular_function | binding                          | tr A0A8C2RAM0 A0A8C2RAM0_CAPHI | -1.21212 | down |
| molecular_function | binding                          | tr A0A8C2SJN8 A0A8C2SJN8_CAPHI | 0.676464 | up   |
| molecular_function | catalytic activity               | tr A0A452EY08 A0A452EY08_CAPHI | -0.61755 | down |
| molecular_function | catalytic activity               | tr A0A8C2RAM0 A0A8C2RAM0_CAPHI | -1.21212 | down |
| molecular_function | catalytic activity               | tr A0A8C2SJN8 A0A8C2SJN8_CAPHI | 0.676464 | up   |
| molecular_function | molecular function regulator     | tr A0A452ENI2 A0A452ENI2_CAPHI | 0.843926 | up   |
| molecular_function | structural molecule activity     | tr A0A452GAM5 A0A452GAM5_CAPHI | 6.332382 | up   |
| molecular_function | transcription regulator activity | tr A0A452EY08 A0A452EY08_CAPHI | -0.61755 | down |

---

**Table S4. Subcellular Localization of DEPs**

| SeqID                          | Subcellular_location | Description                                                                       |
|--------------------------------|----------------------|-----------------------------------------------------------------------------------|
| tr A0A8C2P961 A0A8C2P961_CAPHI | cyto                 | Uncharacterized protein OS=Capra hircus OX=9925 PE=4 SV=1                         |
| tr A0A452GAM5 A0A452GAM5_CAPHI | mito                 | Keratin 82 OS=Capra hircus OX=9925 GN=KRT82 PE=3 SV=1                             |
| tr A0A452EY08 A0A452EY08_CAPHI | cyto_nucl            | Protein arginine N-methyltransferase 5 OS=Capra hircus OX=9925 GN=PRMT5 PE=3 SV=1 |
| tr A0A8C2S8I8 A0A8C2S8I8_CAPHI | E.R.                 | MAP7 domain containing 1 OS=Capra hircus OX=9925 PE=4 SV=1                        |
| tr A0A452ENI2 A0A452ENI2_CAPHI | plas                 | Syntaxin 7 OS=Capra hircus OX=9925 GN=STX7 PE=3 SV=1                              |
| tr A0A452FPA3 A0A452FPA3_CAPHI | nucl                 | KIAA1217 ortholog OS=Capra hircus OX=9925 GN=KIAA1217 PE=4 SV=1                   |
| tr A0A8C2S8I8 A0A8C2S8I8_CAPHI | mito                 | Phosphodiesterase 12 OS=Capra hircus OX=9925 GN=PDE12 PE=4 SV=1                   |
| tr A0A8C2RAM0 A0A8C2RAM0_CAPHI | cyto                 | Glutaredoxin 5 OS=Capra hircus OX=9925 PE=4 SV=1                                  |
| tr A0A452EKV1 A0A452EKV1_CAPHI | cyto                 | Protein MAK16 homolog OS=Capra hircus OX=9925 PE=3 SV=1                           |
| tr A0A452FS44 A0A452FS44_CAPHI | cyto                 | Heme binding protein 2 OS=Capra hircus OX=9925 GN=HEBP2 PE=3 SV=1                 |
| tr A0A452E2T3 A0A452E2T3_CAPHI | nucl                 | Rhophilin Rho GTPase binding protein 2 OS=Capra hircus OX=9925 GN=RHPN2 PE=4 SV=1 |
| tr A0A8C2SL02 A0A8C2SL02_CAPHI | nucl                 | Myosin XVIIIa OS=Capra hircus OX=9925 PE=4 SV=1                                   |
